# Supplementary material for: Human placenta-derived mesenchymal stem cells stimulate neuronal regeneration by promoting axon growth and restoring neuronal activity
Source: Frontiers journal article supplement (doi:10.3389/fcell.2023.1328261), 2023-12-22
Supplement: Data_Sheet_1.PDF [file Data_Sheet_1.PDF]

#### **CAPTION SUPPLEMENTARY FIGURE 1**

**Supplementary figure 1. Immunostaining of hPMSCs.** (A) Flow cytometry shows hPMSCs negative expression of CD133. (B) hPMSCs cultures cells were fixed and immunostained with antibody against vimentin (type III intermediate filament protein, white) and nuclear staining with DAPI (blue). Scale bar: 100 $\mu$ m. (C) Representative immunofluorescence of E-cadherin (epithelial cadherin, green) and nuclear staining with DAPI (blue). Scale bar: 100 $\mu$ m.
